# Supplementary material for: Uncovering Predictors of Lipid Goal Attainment in Type 2 Diabetes Outpatients Using Logic Learning Machine: Insights from the AMD Annals and AMD Artificial Intelligence Study Group
Source: MDPI journal article supplement (doi:10.3390/jcm12124095), 2023-06-16
Supplement: s1 [file s1]

**Figure S1: Type of lipid-lowering drugs prescribed during the inclusion period**

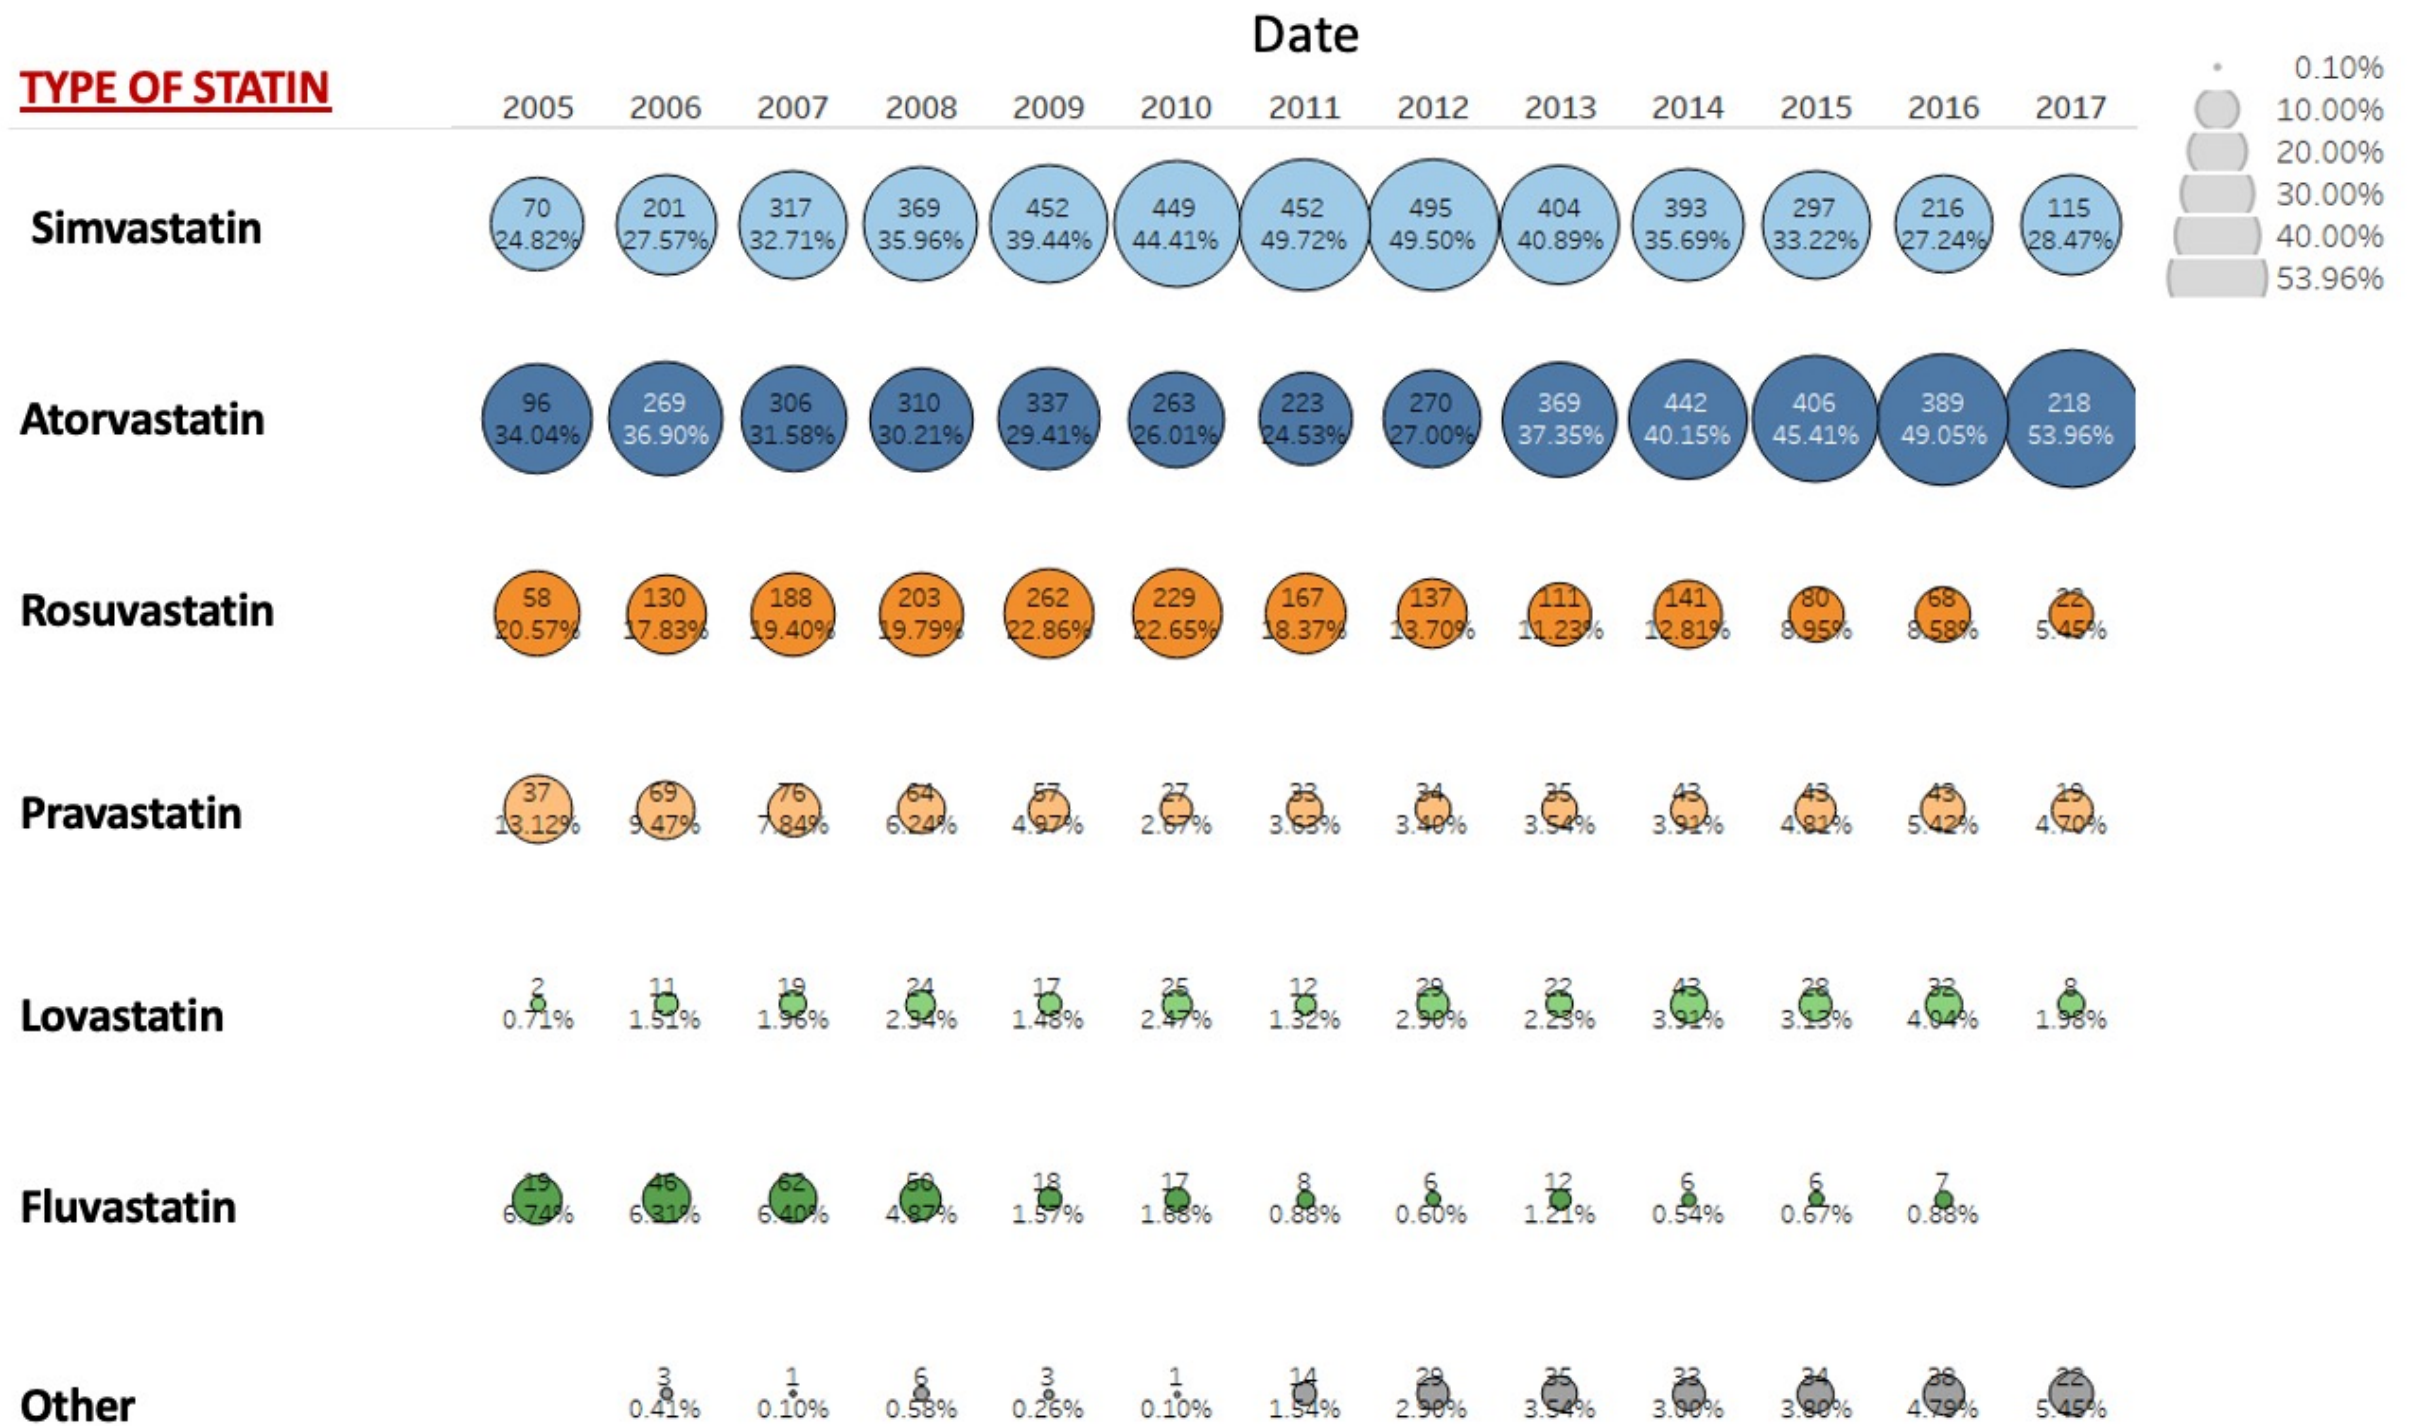

**Figure S2:** Analysis of LDL-C Level Trends in Patients who Achieve/Do Not Achieve Target LDL-C at Two-Year Follow-Up, Stratified by Initial LDL-C Range

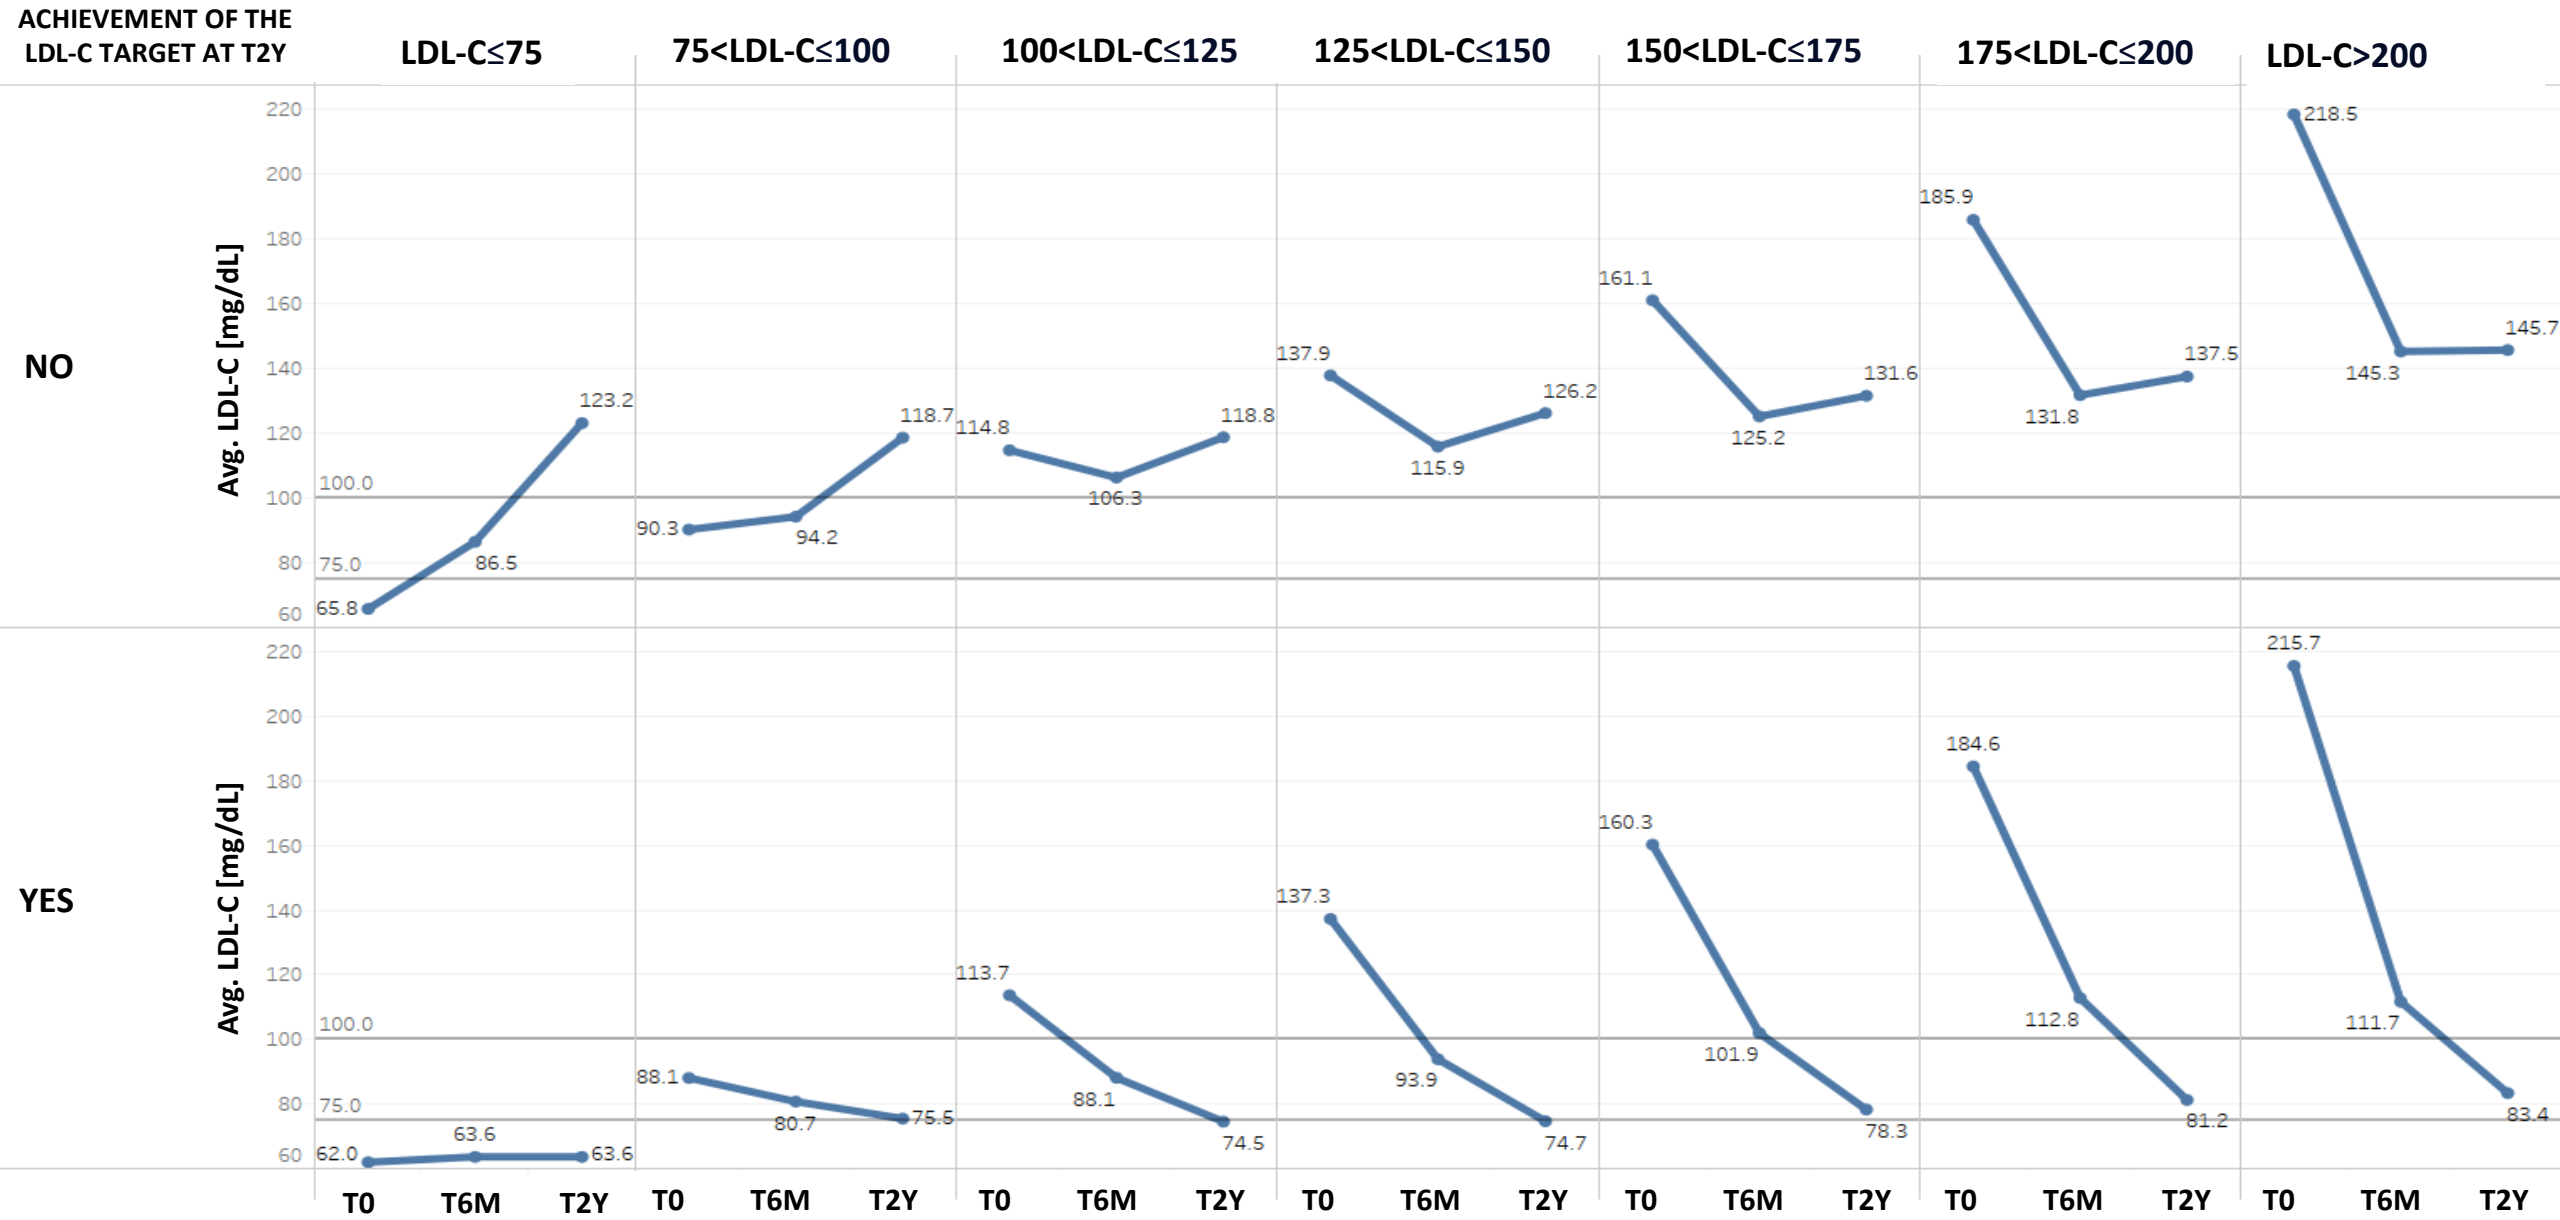

**Figure S3:** ROC-AUC for Logic Learning Machine Model Identifying the Most Relevant Predictive Variables for Achieving C-LDL Goal at T2Y (11.252 patients)

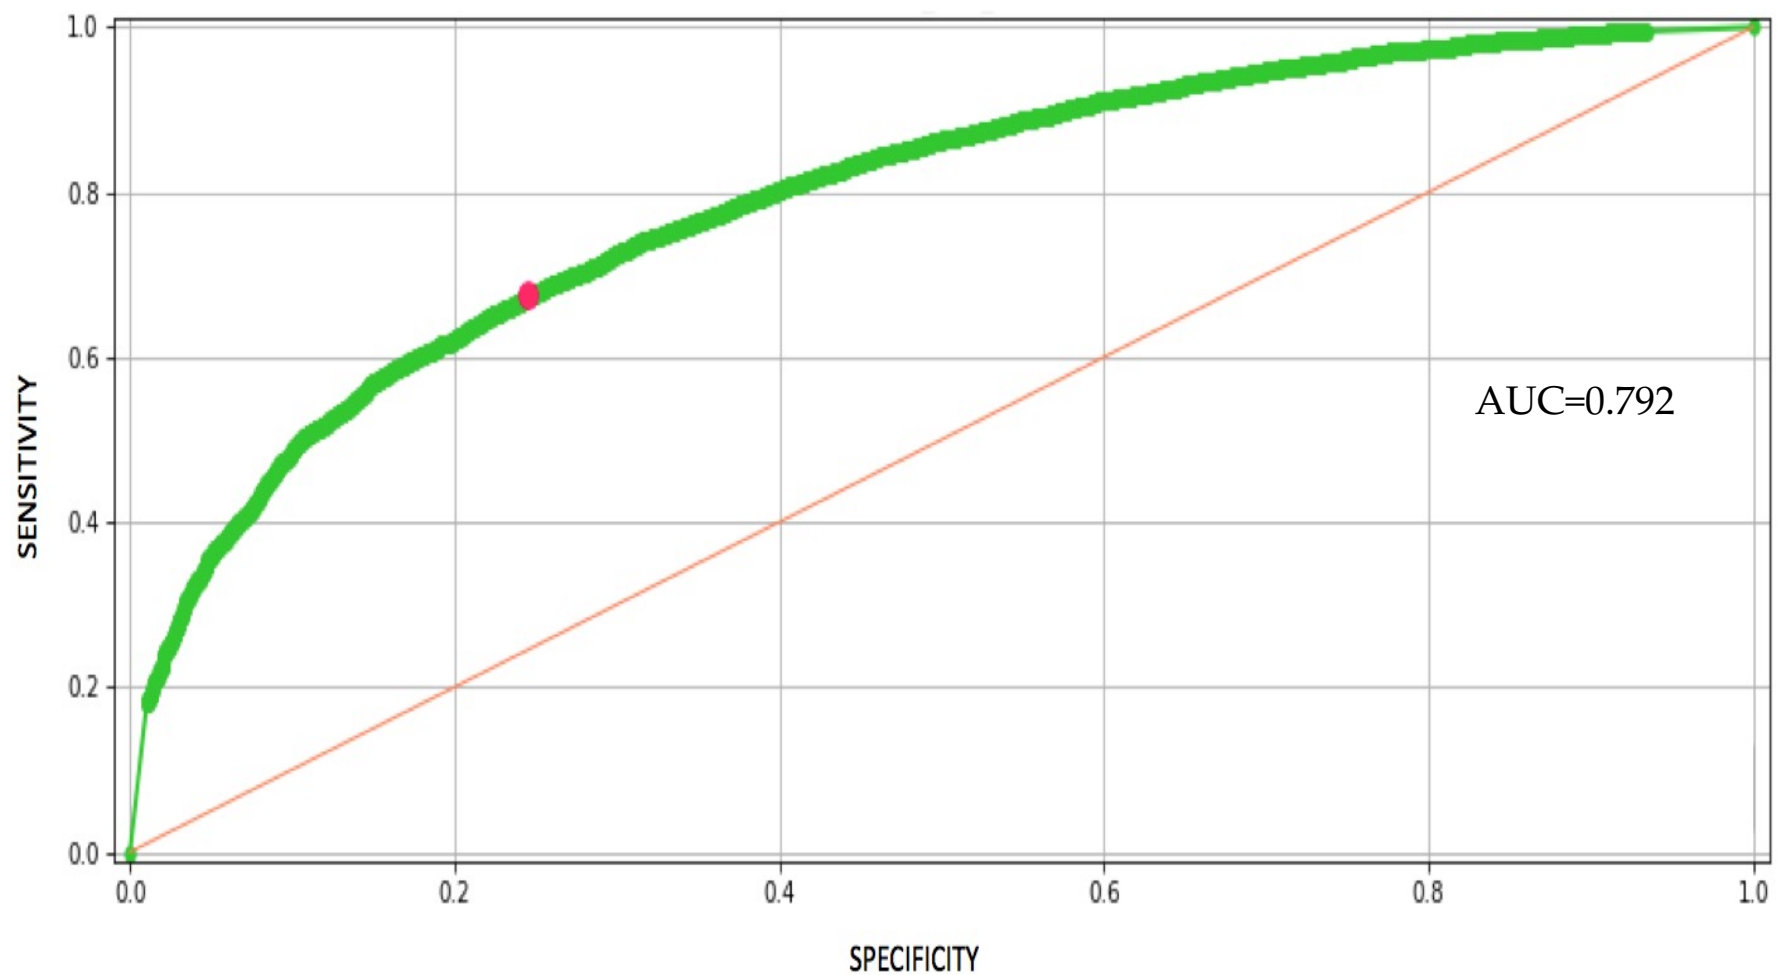

**Figure S4: Specific LLM Models with the most relevant variables predicting achievement of the LDL-C target at T2Y for each initial LDL-C range**

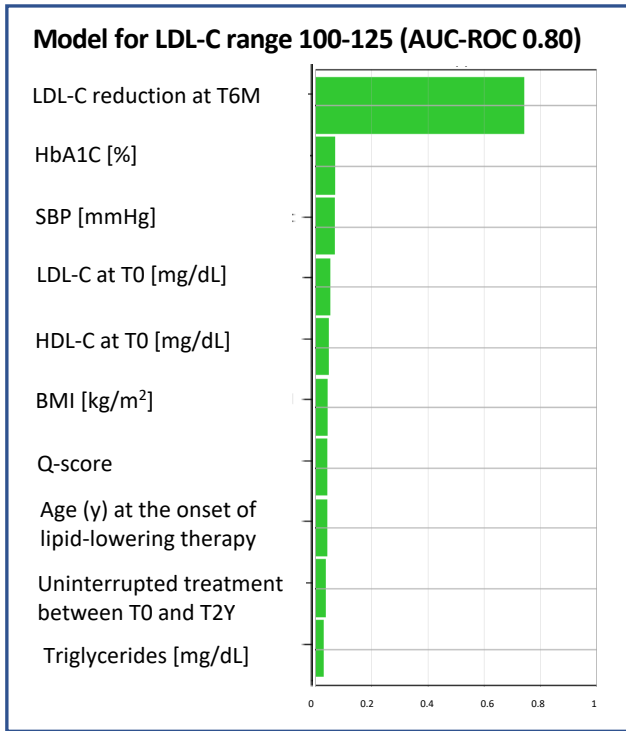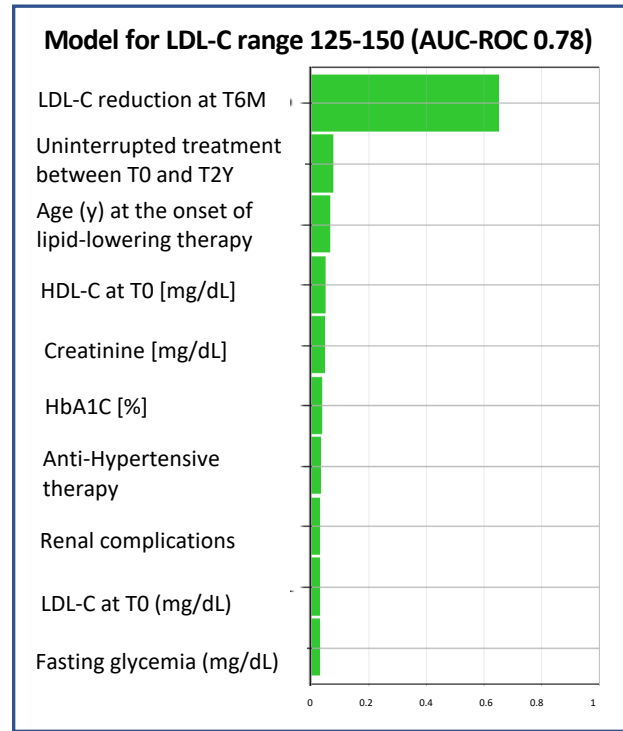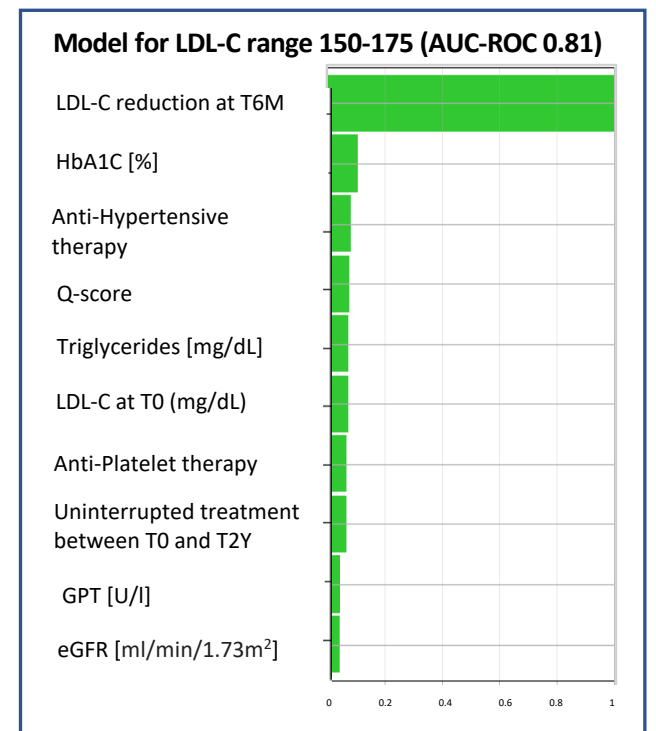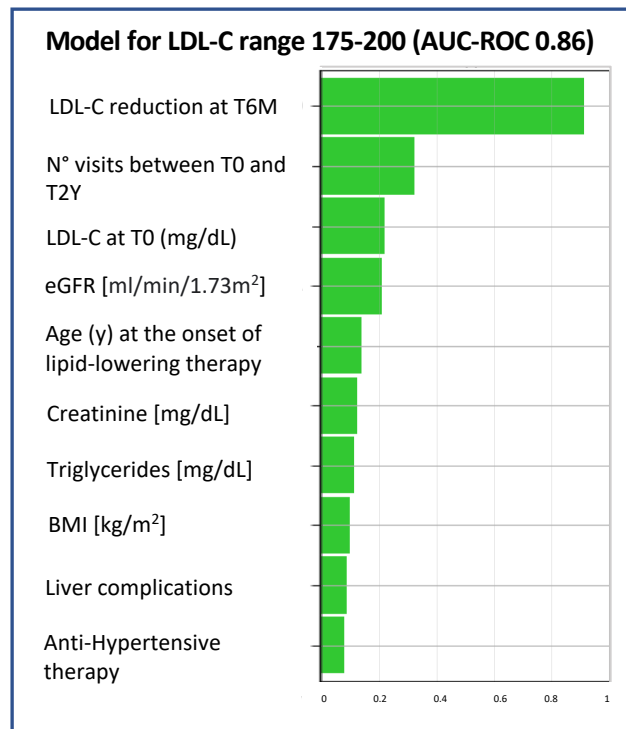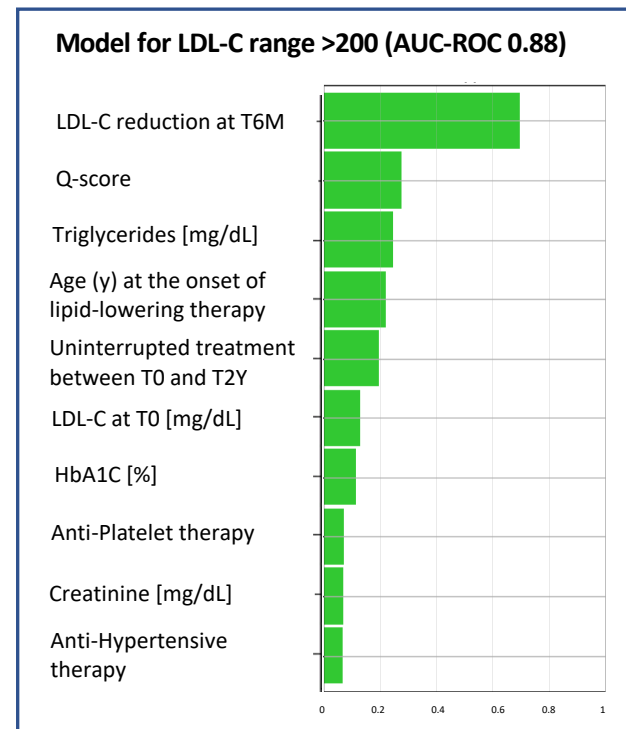

**Table S1: Summary of variables included in the study**

| •ANTROPOMETRIC PARAMETERS                      | •ORGANIZATIONAL PARAMETERS                             |
|------------------------------------------------|--------------------------------------------------------|
| Age;                                           | Q-score;                                               |
| Sex;                                           | Adherence to treatment (self-reported);                |
| Weight;                                        | Years of clinical observation,                         |
| Height;                                        | (considered a proxy of duration of diabetes);          |
| Waist circumference;                           | •TREATMENTS                                            |
| Hip circumference;                             | Drug therapy for diabetes (type and associations);     |
| Body mass index (BMI);                         | Drug therapy for dyslipidemia (type and associations); |
| Systolic blood pressure (BP), diastolic BP;    | Drug therapy for hypertension (present or not);        |
| and derived variables or index.                | Additional drugs.                                      |
| •BIOCHEMICAL PARAMETERS                        | •DIABETES COMPLICATIONS AND COMORBIDITIES              |
| HbA1c at current visit;                        | Presence of nephropathy;                               |
| fasting glucose;                               | Presence of atrial fibrillation;                       |
| Triglycerides;                                 | History of heart failure;                              |
| Total cholesterol;                             | History of stroke;                                     |
| High-density lipoproteins (HDL);               | History of cardiac complications;                      |
| low-density lipoproteins (LDL);                | Presence of vasculopathy;                              |
| Creatinine;                                    | Presence of lower limb complications;                  |
| estimated glomerular filtration rate (eGFR);   | Presence of neuropathy;                                |
| micro–macro/albuminuria;                       | Presence of foot complications;                        |
| serum uric acid;                               | Presence of eye complications;                         |
| serum glutamic oxaloacetic transaminase (GOT); | Presence of hepatopathy.                               |
| serum glutamic pyruvic transaminase (GPT);     |                                                        |
| and same variables for follow-up visits.       |                                                        |

**Table S2:** Categorization of patients based on their anti-diabetic medication, divided into those who meet the target and those who do not

| TREATMENT                   | TARGET LDL-C at T2Y |                      |                  |               |             |                      |                  |               |
|-----------------------------|---------------------|----------------------|------------------|---------------|-------------|----------------------|------------------|---------------|
|                             | NO                  |                      |                  |               | YES         |                      |                  |               |
|                             | Number (n)          | Mean HbA1C (%) at T0 | Mean LDL-C at T0 | % of patients | Number (n)  | Mean HbA1C (%) at T0 | Mean LDL-C at T0 | % of patients |
| METF                        | 1136                | 6,86                 | 145,23           | 26,2          | 1739        | 6,81                 | 125,09           | 25,2          |
| Segretagogues               | 645                 | 7,24                 | 145,70           | 14,9          | 854         | 7,24                 | 124,70           | 12,4          |
| METF+Segretagogues          | 501                 | 7,53                 | 138,24           | 11,5          | 925         | 7,43                 | 117,76           | 13,4          |
| INS                         | 493                 | 7,90                 | 141,78           | 11,4          | 803         | 7,86                 | 115,48           | 11,6          |
| DPP4i                       | 416                 | 7,29                 | 138,25           | 9,6           | 716         | 7,28                 | 115,02           | 10,4          |
| Only dietary recommendation | 420                 | 6,36                 | 147,20           | 9,7           | 509         | 6,37                 | 128,12           | 7,4           |
| INS+METF                    | 206                 | 8,28                 | 139,57           | 4,7           | 441         | 8,07                 | 115,68           | 6,4           |
| INS+Segretagogues           | 126                 | 8,09                 | 136,84           | 2,9           | 203         | 8,03                 | 118,58           | 2,9           |
| TZD                         | 112                 | 7,45                 | 142,70           | 2,6           | 180         | 7,26                 | 132,94           | 2,6           |
| INS+METF+Segretagogues      | 88                  | 8,21                 | 137,58           | 2             | 190         | 8,07                 | 118,33           | 2,8           |
| GLP1_RA                     | 87                  | 7,65                 | 135,35           | 2             | 152         | 7,36                 | 116,89           | 2,2           |
| INS+DPP4i                   | 35                  | 7,73                 | 126,86           | 0,8           | 68          | 7,72                 | 110,87           | 1             |
| SGLT2i                      | 28                  | 7,40                 | 148,81           | 0,6           | 49          | 7,17                 | 121,16           | 0,7           |
| ACARBOSE                    | 23                  | 6,82                 | 164,61           | 0,5           | 32          | 6,79                 | 123,78           | 0,5           |
| INS+SGLT2i                  | 18                  | 9,02                 | 144,33           | 0,4           | 19          | 8,05                 | 98,82            | 0,3           |
| INS+TZD                     | 8                   | 7,90                 | 134,65           | 0,2           | 15          | 8,57                 | 117,72           | 0,2           |
| INS+GLP1_RA                 | 1                   | 6,50                 | 102,00           | 0             | 14          | 8,11                 | 102,41           | 0,2           |
| <b>Total</b>                | <b>4343</b>         |                      |                  |               | <b>6909</b> |                      |                  |               |

**Abbreviations:** n, number; METF, metformin; INS, insulin; TZD, thiazolidinediones, GLP1\_RA, Glucagon-like peptide-1 agonists; SGLT2i, The sodium glucose cotransporter 2 inhibitors; DPP4i, Dipeptidyl peptidase 4 inhibitors

**Figure S5:** Differences in baseline HbA1c and LDL-C among those patients who meet the target of LDL-C at T2Y and those who do not, for each type of antidiabetic treatment

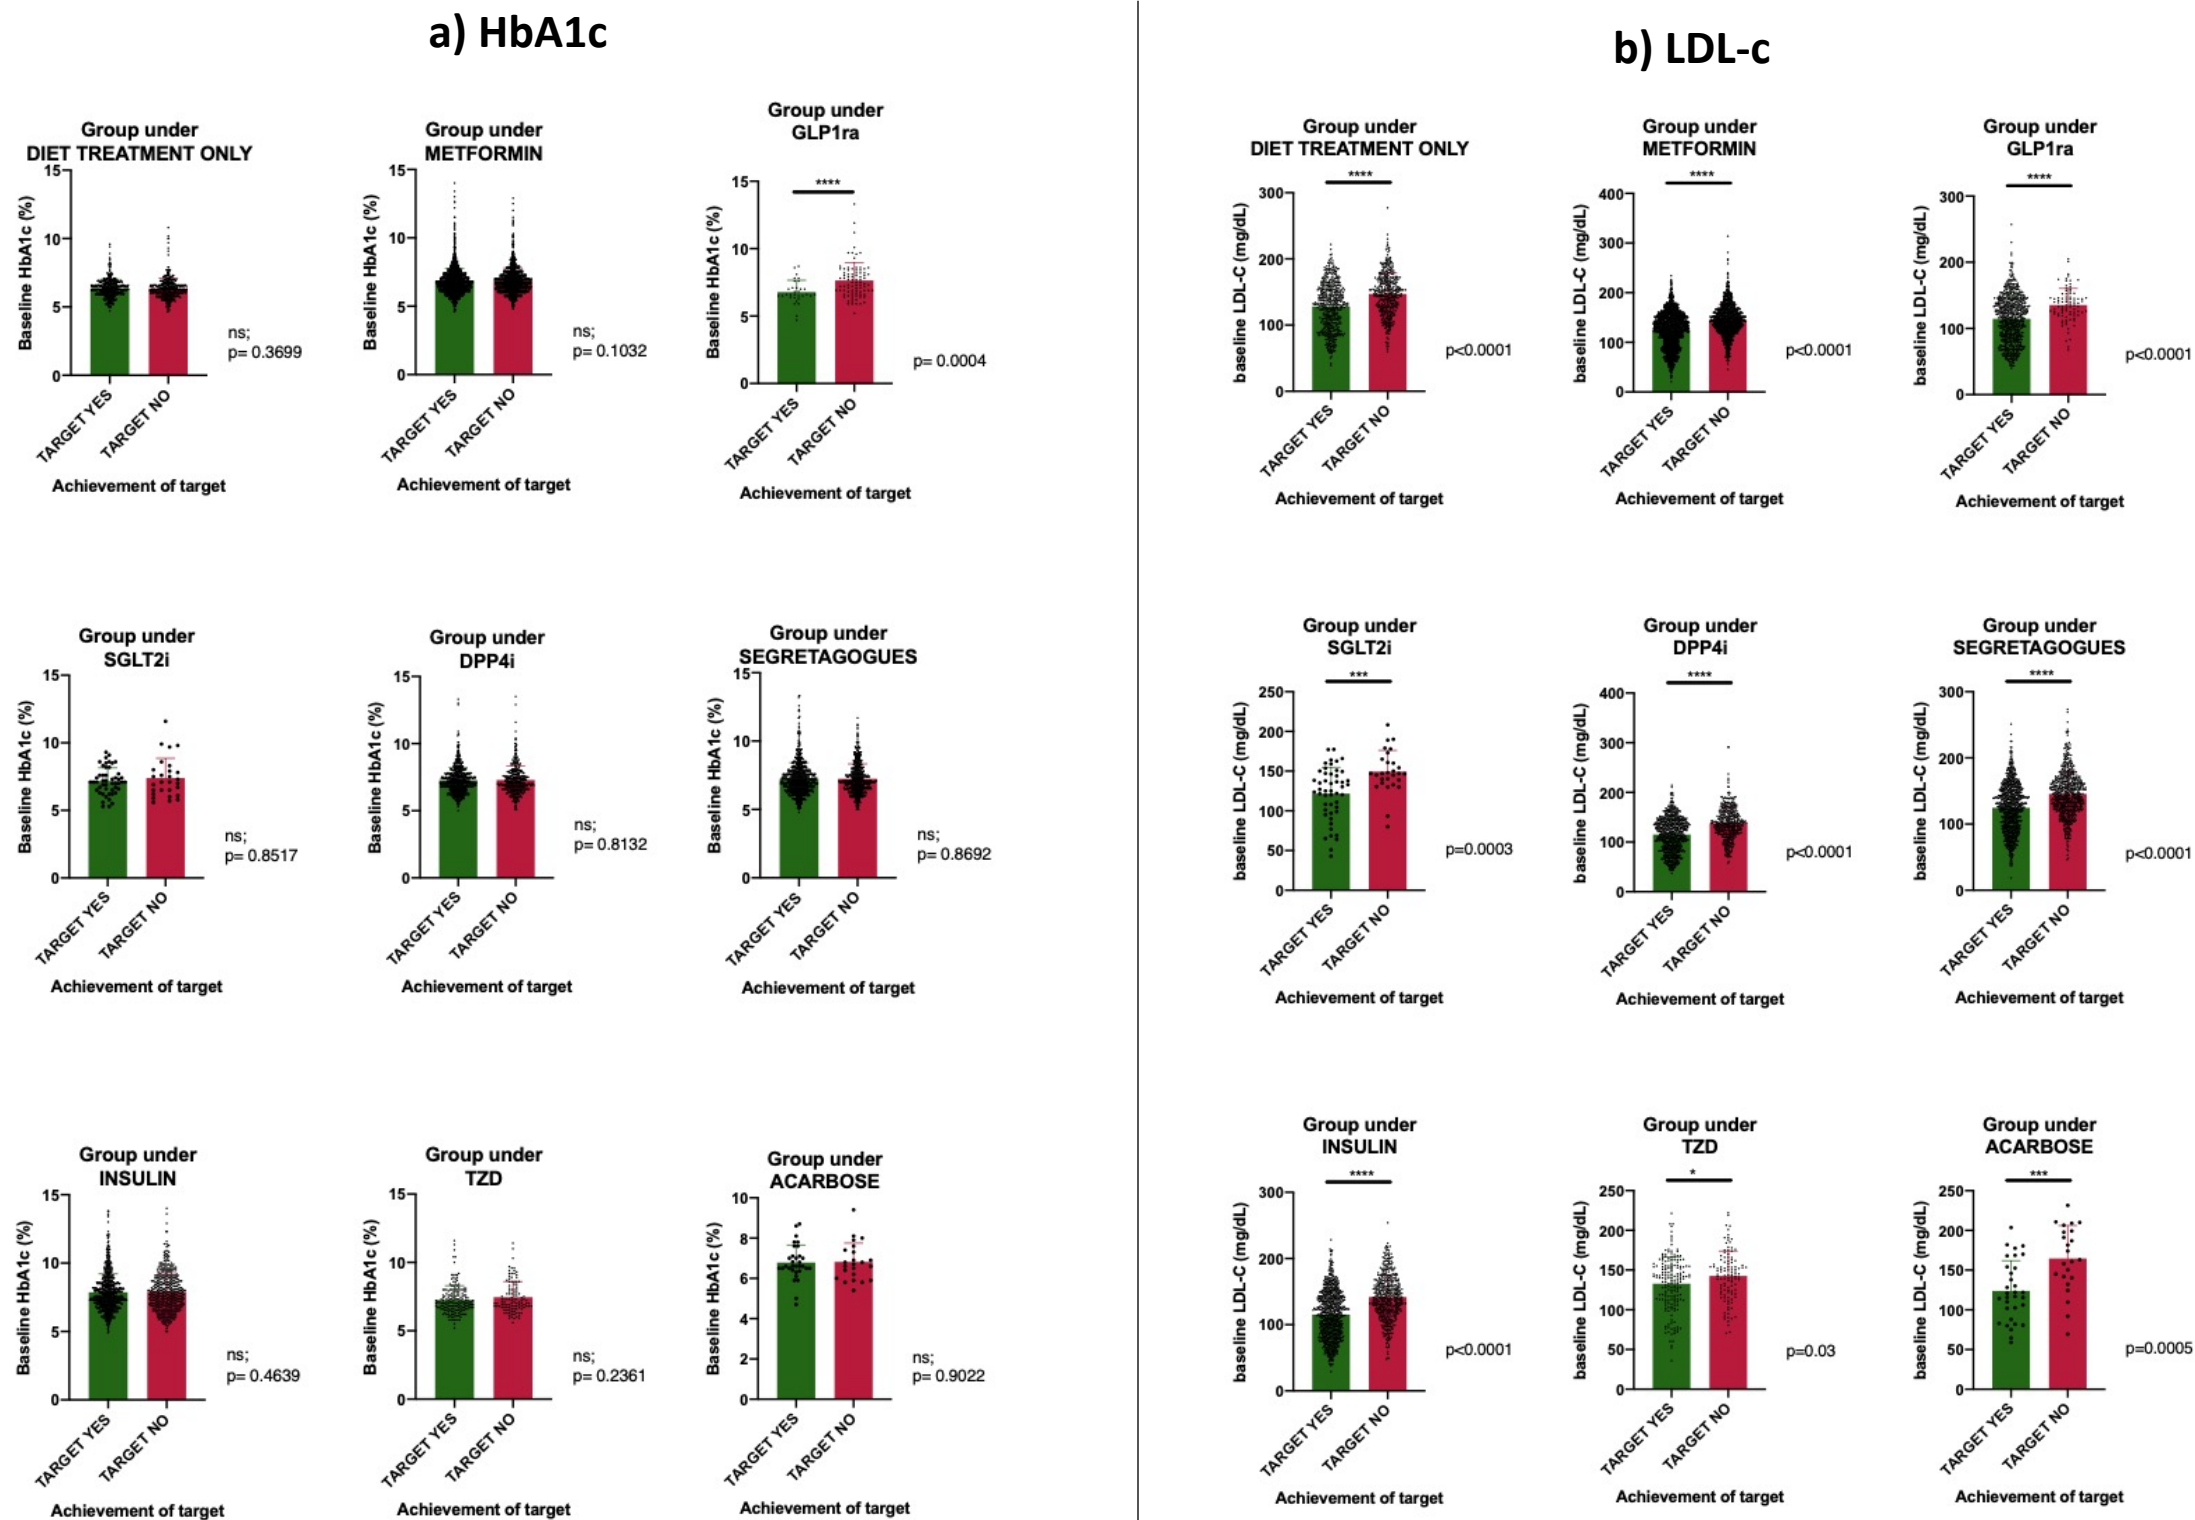

**Abbreviations:**; INS, insulin; TZD, thiazolidinediones, GLP1ra, Glucagon-like peptide-1 agonists; SGLT2i, The sodium glucose cotransporter 2 inhibitors; DPP4i, Dipeptidyl peptidase 4 inhibitors
